# Supplementary material for: Potential application of the oxidative nucleic acid damage biomarkers in detection of diseases
Source: PubMed Central journal article supplement (PMC5650463; doi:10.18632/oncotarget.20801), 2017-09-08
Supplement: oncotarget-08-75767-s001.pdf [file oncotarget-08-75767-s001.pdf]

## **Potential application of the oxidative nucleic acid damage biomarkers in detection of diseases**

### **SUPPLEMENTARY MATERIALS**

**Supplementary Table 1: Summary of studies in oxidative nucleic acid damage biomarkers.**  
See Supplementary\_Table\_1
